# Supplementary material for: Selective binding of methotrexate to monomeric, dimeric and polymeric cyclodextrins
Source: Royal Society of Chemistry journal article supplement (doi:10.1039/c8nj02632g), 2018-01-01
Supplement: c8nj02632g1.pdf [file c8nj02632g1.pdf]

## Supporting Information

### Selective Binding of Methotrexate to Monomeric, Dimeric and Polymeric Cyclodextrins

Iliya Kritskiy<sup>a</sup>, Roman Kumeev<sup>a</sup>, Tatyana Volkova<sup>a</sup>, Dmitry Shipilov<sup>b</sup>, Natalya Kutyasheva<sup>b</sup>, Mikhail Grachev<sup>b</sup>, Irina Terekhova<sup>a,\*</sup>

<sup>a</sup> G.A. Krestov Institute of Solution Chemistry, Russian Academy of Sciences, 153045 Ivanovo, Russia

<sup>b</sup> Institute of Biology and Chemistry of Moscow State University of Education, 129164 Moscow, Russia

#### 1. Determination of the stability constants of MTX/CD complexes from the capillary electrophoresis data.

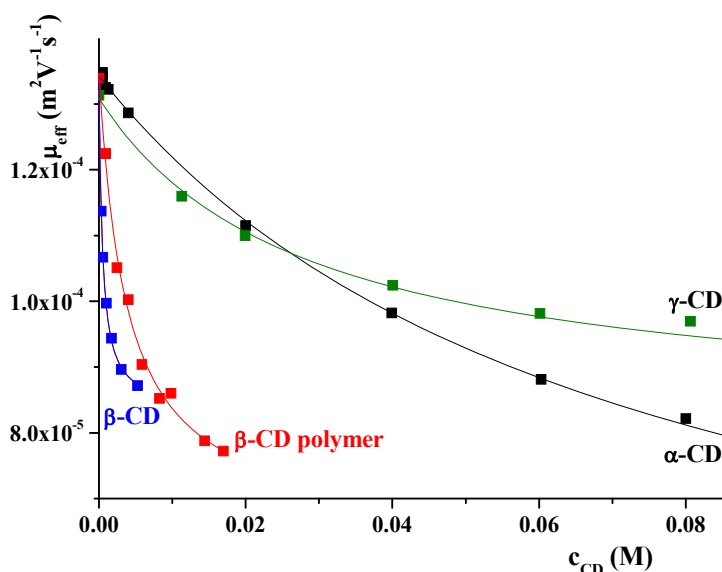

**Figure 1SI.** Dependence of viscosity-corrected effective mobility of MTX on CD concentration (pH 2.2, 298.15 K).

Dependences of the viscosity-corrected effective mobility of MTX on CD concentration were used for calculation of the stability constants of CD/MTX complexes. The 1:1 equilibrium of complex formation is described by the following equation:

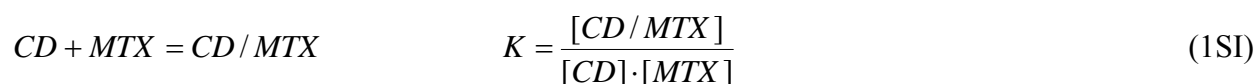

The effective MTX mobility is expressed as

$$\mu_{eff} = \alpha_{MTX} \cdot \mu_{MTX} + \alpha_{CD/MTX} \cdot \mu_{CD/MTX} \quad (2SI)$$

where  $\alpha_{MTX}$  and  $\alpha_{CD/MTX}$  are the fractions of free MTX and CD/MTX complexes, respectively;  $\mu_{MTX}$  and  $\mu_{CD/MTX}$  are the mobilities of free MTX and CD/MTX complexes, respectively. The total concentration of MTX ( $C_{MTX}$ ) can be written as follows:

$$C_{MTX} = [MTX] + [CD/MTX] \quad (3SI)$$

where  $[MTX]$  and  $[CD/MTX]$  are the concentrations of free MTX and CD/MTX complexes, respectively.

The mathematical combination of Eqs. 1SI-3SI gives the equation for the observed MTX mobility:

$$\mu_{eff} = \frac{\mu_{MTX} + \mu_{CD/MTX} \cdot K \cdot [CD]}{1 + K \cdot [CD]} \quad (4SI)$$

The values of  $K$  were calculated according to equation (4SI) by non-linear least-squares regression analysis.

## 2. Determination of the thermodynamic parameters of complex formation.

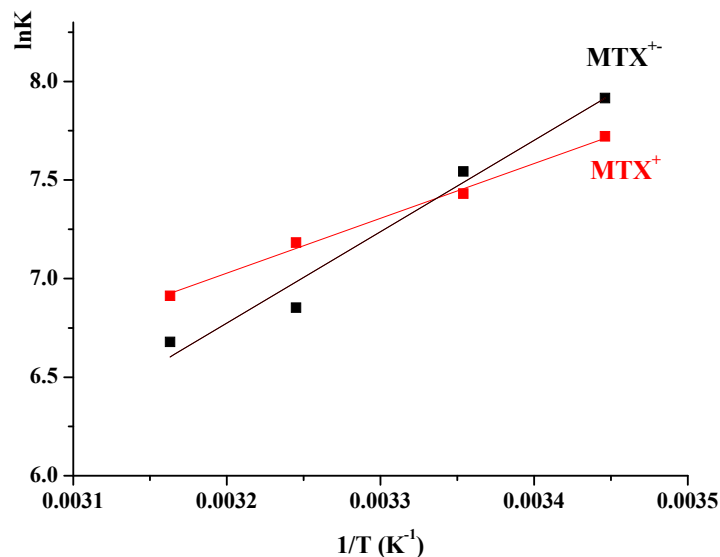

**Figure 2SI.** Van't Hoff plots for complex formation of cationic (MTX<sup>+</sup>) and zwitterionic (MTX<sup>±</sup>) forms of MTX with  $\beta$ -CD in buffer pH 2.2.

Thermodynamic parameters of complex formation such as the enthalpy and entropy changes were calculated from the relationship according to the van't Hoff equation:

$$\ln K = -\frac{\Delta H}{RT} + \frac{\Delta S}{R} \quad (5SI)$$

where  $\Delta H$  and  $\Delta S$  are the enthalpy and entropy of complex formation, respectively;  $T$  is the temperature;  $R$  is the gas constant. Values of  $\Delta H$  and  $\Delta S$  can be easily obtained from van't Hoff plots.
